# Supplementary material for: Should HIV testing for all pregnant women continue? Cost-effectiveness of universal antenatal testing compared to focused approaches across high to very low HIV prevalence settings
Source: PubMed Central journal article supplement (PMC5159683; doi:10.7448/ias.19.1.21212), 2016-12-14
Supplement: JIAS-19-21212-s001.pdf [file JIAS-19-21212-s001.pdf]

Supplementary table 1. Health outcomes, costs and cost-effectiveness of different HIV testing approaches in four country-based cases (per 1,000,000 pregnant women)

| Country-based case<br>(HIV prevalence<br>among pregnant<br>women) | Approach       | MTCT Rate | Health Outcomes                       |                                              |                                               |                                                      | Costs (US\$ thousands)                  |                                                   |                                       |                                                                          | Incremental cost-effectiveness ratio<br>(US\$)<br>based on PMTCT cost <sup>2</sup> |                               |                      |
|-------------------------------------------------------------------|----------------|-----------|---------------------------------------|----------------------------------------------|-----------------------------------------------|------------------------------------------------------|-----------------------------------------|---------------------------------------------------|---------------------------------------|--------------------------------------------------------------------------|------------------------------------------------------------------------------------|-------------------------------|----------------------|
|                                                                   |                |           | Number of<br>HIV+ women<br>identified | Number of<br>new<br>paediatric<br>infections | Number<br>paediatric<br>infections<br>averted | Quality-<br>adjusted life<br>years (QALYs)<br>gained | HIV testing<br>(test kit +<br>services) | PMTCT (HIV<br>test, ARVs, and<br>health services) | Paediatric<br>treatment (20<br>years) | Total cost (PMTCT<br>including HIV testing<br>+ paediatric<br>treatment) | Cost saved <sup>1</sup>                                                            | cost per infection<br>averted | cost per QALY gained |
| Namibia (17%)                                                     | Highly focused | 18%       | 89,710                                | 30,019                                       | 24,824                                        | 496,475                                              | 1,527                                   | 28,446                                            | 70,322                                | 98,768                                                                   | 107,106                                                                            |                               |                      |
|                                                                   | Current        | 12%       | 138,221                               | 20,621                                       | 34,221                                        | 684,426                                              | 2,541                                   | 39,651                                            | 48,385                                | 88,035                                                                   | 117,838                                                                            | weakly dominated              | weakly dominated     |
|                                                                   | Focused        | 8%        | 148,803                               | 13,667                                       | 41,175                                        | 823,508                                              | 2,673                                   | 47,324                                            | 32,152                                | 79,476                                                                   | 126,398                                                                            | 1,154                         | 58                   |
|                                                                   | Universal      | 7%        | 155,765                               | 11,740                                       | 43,102                                        | 862,040                                              | 2,863                                   | 49,604                                            | 27,654                                | 77,258                                                                   | 128,616                                                                            | 1,183                         | 59                   |
| Kenya (7%)                                                        | Highly focused | 22%       | 32,175                                | 15,266                                       | 10,635                                        | 212,703                                              | 504                                     | 8,096                                             | 31,856                                | 39,952                                                                   | 46,671                                                                             |                               |                      |
|                                                                   | Current        | 13%       | 63,584                                | 9,041                                        | 16,860                                        | 337,200                                              | 1,513                                   | 13,610                                            | 18,891                                | 32,501                                                                   | 54,122                                                                             | weakly dominated              | weakly dominated     |
|                                                                   | Focused        | 10%       | 57,366                                | 7,053                                        | 18,848                                        | 376,953                                              | 1,249                                   | 14,785                                            | 14,751                                | 29,536                                                                   | 57,087                                                                             | 814                           | 41                   |
|                                                                   | Universal      | 6%        | 65,658                                | 4,350                                        | 21,551                                        | 431,016                                              | 1,562                                   | 17,055                                            | 9,121                                 | 26,175                                                                   | 60,448                                                                             | 840                           | 42                   |
| Haiti (3%)                                                        | Highly focused | 21%       | 10,923                                | 5,026                                        | 3,247                                         | 64,937                                               | 326                                     | 2,921                                             | 10,522                                | 13,444                                                                   | 14,310                                                                             |                               |                      |
|                                                                   | Current        | 17%       | 14,635                                | 4,014                                        | 4,259                                         | 85,178                                               | 522                                     | 3,926                                             | 8,408                                 | 12,334                                                                   | 15,420                                                                             | weakly dominated              | weakly dominated     |
|                                                                   | Focused        | 11%       | 18,731                                | 2,705                                        | 5,568                                         | 111,357                                              | 638                                     | 5,089                                             | 5,674                                 | 10,763                                                                   | 16,992                                                                             | 934                           | 47                   |
|                                                                   | Universal      | 8%        | 21,646                                | 1,838                                        | 6,434                                         | 128,689                                              | 771                                     | 5,915                                             | 3,864                                 | 9,778                                                                    | 17,976                                                                             | 953                           | 48                   |
| Viet Nam (0.1%)                                                   | Highly focused | 23%       | 577                                   | 303                                          | 214                                           | 4,284                                                | 231                                     | 370                                               | 638                                   | 1,008                                                                    | 738                                                                                |                               |                      |
|                                                                   | Focused        | 11%       | 1,020                                 | 139                                          | 378                                           | 7,565                                                | 448                                     | 694                                               | 292                                   | 987                                                                      | 759                                                                                | 1,977                         | 99                   |
|                                                                   | Current        | 15%       | 932                                   | 188                                          | 328                                           | 6,569                                                | 531                                     | 744                                               | 397                                   | 1,141                                                                    | 605                                                                                | dominated                     | dominated            |
|                                                                   | Universal      | 6%        | 1,168                                 | 84                                           | 433                                           | 8,663                                                | 665                                     | 947                                               | 177                                   | 1,123                                                                    | 622                                                                                | 4,601                         | 230                  |

<sup>1</sup> as compared to no PMTCT interventions

<sup>2</sup> based on PMTCT cost only, does not include paediatric treatment cost

## Supplementary table 2. Virtual country scenario

|                  |                                                                                                                                                                                                                                                                                                                                                                                    |                             |
|------------------|------------------------------------------------------------------------------------------------------------------------------------------------------------------------------------------------------------------------------------------------------------------------------------------------------------------------------------------------------------------------------------|-----------------------------|
| Country scenario | Annual live births: 1 000 000<br>Population: 50% reside in high HIV burden area and 50% in low HIV burden area<br>Proportion of HIV-positive women reside in high burden area: 70%<br>PMTCT services: ANC coverage 75%, HIV testing coverage 74% among all pregnant women, ART coverage among HIV-infected pregnant women 67%<br>Unit cost: same as 4 country-based case scenarios |                             |
| Key parameters   | HIV prevalence                                                                                                                                                                                                                                                                                                                                                                     | 0.0005% - 20%               |
|                  | HIV-positive women in high burden area                                                                                                                                                                                                                                                                                                                                             | 50% - 90%                   |
|                  | HIV testing cost                                                                                                                                                                                                                                                                                                                                                                   | 1 US\$ - 6 US\$/test        |
|                  | Paediatric treatment cost (annual)                                                                                                                                                                                                                                                                                                                                                 | 300 US\$ - 1000 US\$/person |

| Approach  | Subnational area                                                                  |                                                                                   |                                                                                                                                                                                                                |
|-----------|-----------------------------------------------------------------------------------|-----------------------------------------------------------------------------------|----------------------------------------------------------------------------------------------------------------------------------------------------------------------------------------------------------------|
|           | High HIV burden                                                                   | Low burden                                                                        |                                                                                                                                                                                                                |
| Current   |  |  |  Current PMTCT service coverage                                                                                               |
| Focused   |  |  |  Best PMTCT coverage (ANC coverage 95%, HIV testing among ANC attendees 95%, ART coverage among those tested positive 95%)    |
| Universal |  |  |  Low PMTCT coverage (Current ANC coverage, HIV testing among ANC attendees 20%, ART coverage among those tested positive 95%) |
